# Supplementary material
Source: publisher figshare collection journal article supplement (https://springernature.figshare.com/ndownloader/files/17426591)
Supplement: Supplementary file [file 17426591]

## **SUPPLEMENTARY MATERIAL**

For

### **The Impact of Spikes in Handgun Acquisitions on Firearm-Related Harms**

Hannah S. Laqueur<sup>CO</sup> PhD, MS, MPA, Rose M.C. Kagawa<sup>CO</sup> PhD, MPH, Christopher D. McCort  
MS, Rocco Pallin MPH, Garen Wintemute MD, MPH

\*CO indicates co-first authorship

#### **Table of Contents**

Figure S1: Heat map of city spikes

Figure S2: Power calculation simulations

Table S1: All time periods and all outcomes

Table S2: Risk Ratios from SARIMA models using 1-week and 6-week bins (52-week results)

Table S3: Risk ratios calculated from lower and upper bounds of first stage estimates

**FIGURE S1: HEAT MAP OF CITY SPIKES**

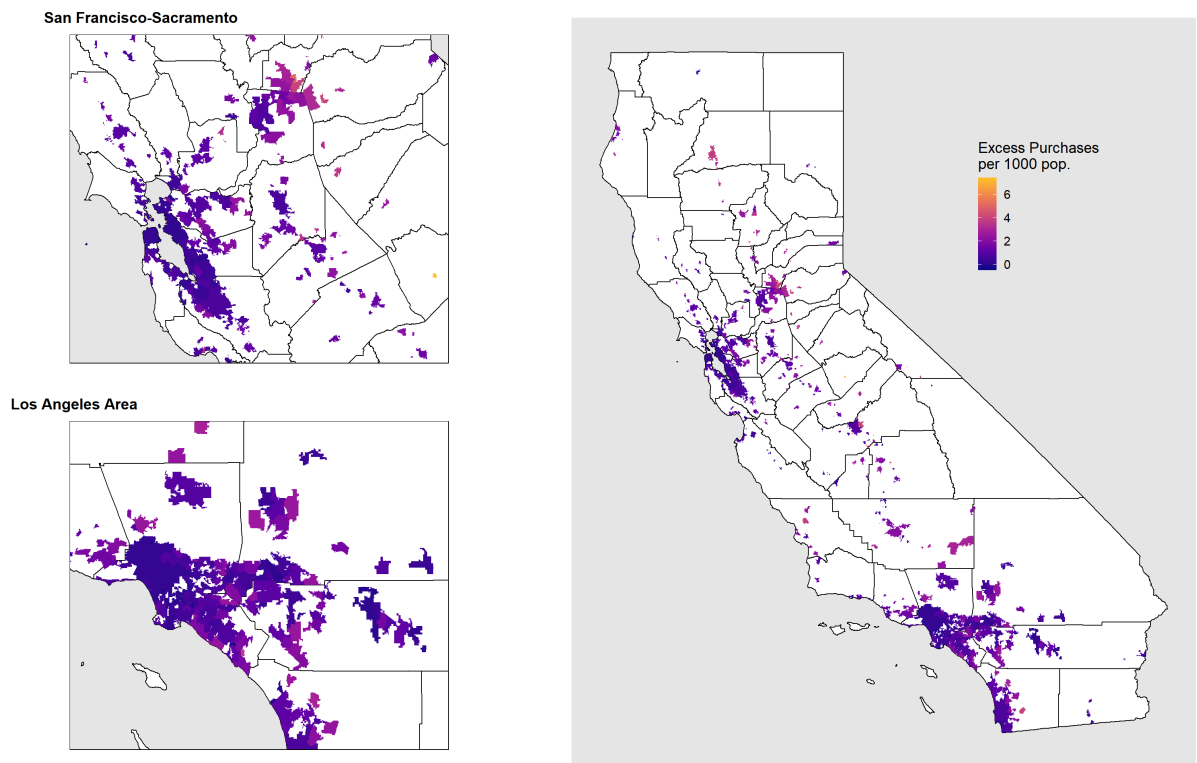

**FIGURE S2: POWER CALCULATION SIMULATIONS<sup>1,2</sup>**

**INJURY (EXCLUDING MORTALITY)**

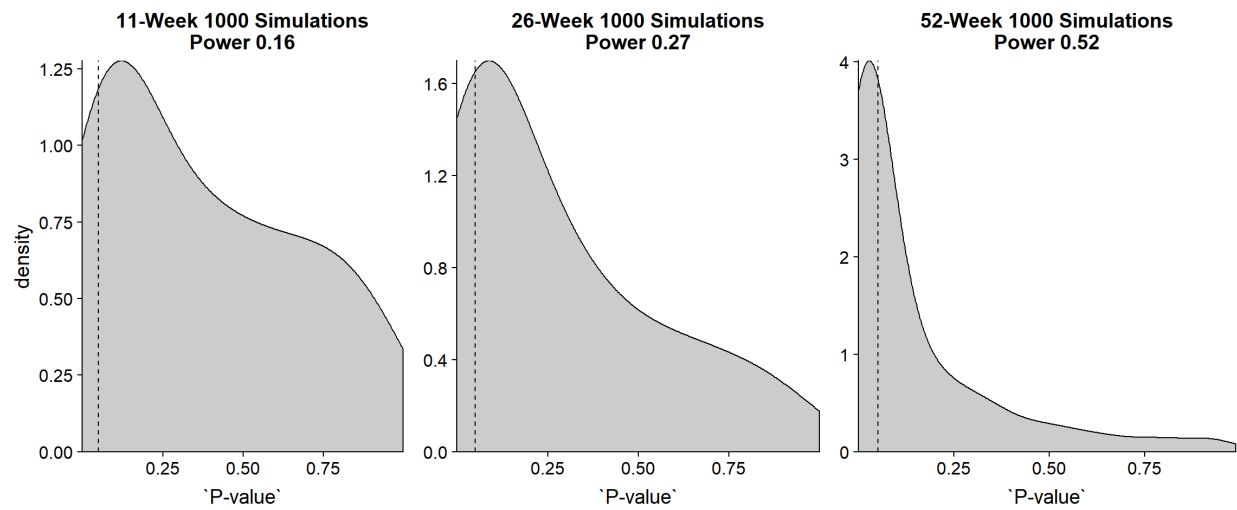

**MORTALITY**

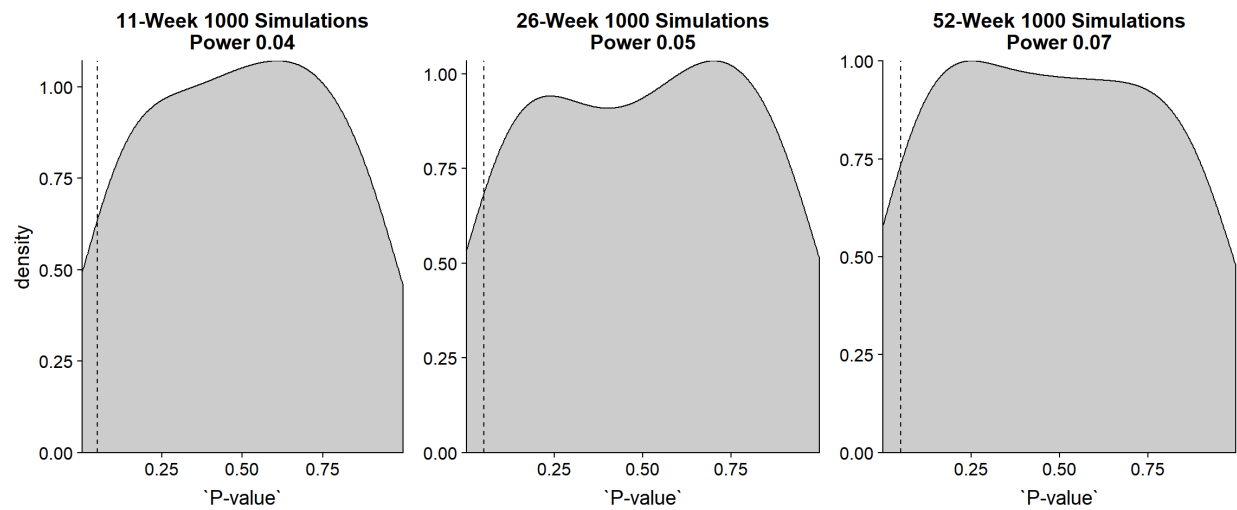

<sup>1</sup> Power is calculated as the area under the curve from [0, 0.05]

<sup>2</sup> Densities are smoothed

**TABLE S1: ALL TIME PERIODS AND ALL OUTCOMES**

|                          | <b>11-Week<br/>Risk Ratio<br/>(95% CI)</b> | <b>26-Week<br/>Risk Ratio<br/>(95% CI)</b> | <b>52-Week<br/>Risk Ratio<br/>(95% CI)</b> |
|--------------------------|--------------------------------------------|--------------------------------------------|--------------------------------------------|
| <b>Firearm Violence</b>  | 1.018                                      | 1.029                                      | 1.033                                      |
|                          | (0.945, 1.097)                             | (0.980, 1.081)                             | (0.997, 1.070)                             |
| <b>Firearm Mortality</b> | 1.077                                      | 1.042                                      | 0.993                                      |
|                          | (0.936, 1.242)                             | (0.953, 1.139)                             | (0.932, 1.058)                             |
| <b>Interpersonal</b>     | 0.967                                      | 0.977                                      | 0.937                                      |
|                          | (0.771, 1.206)                             | (0.837, 1.140)                             | (0.837, 1.049)                             |
| <b>Self-directed</b>     | 1.137                                      | 1.033                                      | 1.001                                      |
|                          | (0.928, 1.396)                             | (0.916, 1.165)                             | (0.921, 1.088)                             |
| <b>Unintentional</b>     | 0.333                                      | 0.794                                      | 0.765                                      |
|                          | (0.091, 0.879)                             | (0.397, 1.539)                             | (0.442, 1.279)                             |
| <b>Undetermined</b>      | 1.884                                      | 3.619                                      | 0.656                                      |
|                          | (0.000, Inf)                               | (0.690, 112.811)                           | (0.187, 1.781)                             |
| <b>Firearm Injury</b>    | 0.985                                      | 1.012                                      | 1.044                                      |
|                          | (0.901, 1.076)                             | (0.953, 1.074)                             | (1.000, 1.089)                             |
| <b>Interpersonal</b>     | 1.092                                      | 1.119                                      | 1.092                                      |
|                          | (0.920, 1.296)                             | (0.997, 1.256)                             | (1.003, 1.189)                             |
| <b>Self-directed</b>     | 0.9                                        | 0.944                                      | 1.099                                      |
|                          | (0.454, 1.709)                             | (0.624, 1.414)                             | (0.860, 1.407)                             |
| <b>Unintentional</b>     | 1.135                                      | 0.994                                      | 1.057                                      |
|                          | (0.799, 1.608)                             | (0.775, 1.270)                             | (0.892, 1.252)                             |
| <b>Undetermined</b>      | 0.253                                      | 0.958                                      | 1.185                                      |
|                          | (0.032, 0.958)                             | (0.554, 1.651)                             | (0.778, 1.817)                             |

Associations between excess handguns (per 1,000 population) acquired during the 11-week period following the 2012 presidential election and Sandy Hook and firearm violence rates (per 1,000 population)

**TABLE S2: RISK RATIOS FROM SARIMA MODELS USING 1-WEEK AND 6-WEEK BINS (52-WEEK ESTIMATES)**

|                          | <b>1-Week Bins</b><br>Risk Ratio<br>(95% CI) | <b>6-Week Bins</b><br>Risk Ratio<br>(95% CI) |
|--------------------------|----------------------------------------------|----------------------------------------------|
| <b>Firearm Violence</b>  | 1.022<br>(0.991, 1.053)                      | 1.045<br>(1.012, 1.079)                      |
| <b>Firearm Mortality</b> | 0.985<br>(0.932, 1.042)                      | 0.992<br>(0.937, 1.050)                      |
| <b>Firearm Injury</b>    | 1.032<br>(0.994, 1.071)                      | 1.066<br>(1.024, 1.110)                      |

Purchases are binned in shorter time periods (1-week and 6-week bins) in SARIMA models  
1-week bin estimates were less stable, particularly for small cities  
6-week bins included some post-spike time in the spike period

**TABLE S3: RISK RATIOS CALCULATED FROM LOWER AND UPPER BOUNDS OF FIRST STAGE ESTIMATES**

|                          | <b>52-Week Estimates</b> | <b>Estimates Using Lower Bound<br/>(of spike) from First Stage</b> | <b>Estimates Using Upper Bound<br/>(of spike) from First Stage</b> |
|--------------------------|--------------------------|--------------------------------------------------------------------|--------------------------------------------------------------------|
| <b>Firearm Violence</b>  | 1.033                    | 1.039                                                              | 1.027                                                              |
|                          | (0.997, 1.070)           | (0.997, 1.083)                                                     | (0.997, 1.058)                                                     |
| <b>Firearm Mortality</b> | 0.993                    | 0.996                                                              | 0.992                                                              |
|                          | (0.932, 1.058)           | (0.925, 1.073)                                                     | (0.940, 1.046)                                                     |
| <b>Firearm Injury</b>    | 1.044                    | 1.051                                                              | 1.037                                                              |
|                          | (1.000, 1.089)           | (1.000, 1.104)                                                     | (1.000, 1.076)                                                     |
